# Supplementary material for: Exome sequencing reveals pathogenic mutations in 91 strains of mice with Mendelian disorders
Source: HighWire-hosted journal article supplement (doi:10.1101/gr.186882.114), 2015-04-27
Supplement: Supplemental_Table_2.xlsx [file Supplemental_Table_2.xlsx]

## Sheet: Sheet1
Strain	Total Sanger	Total JAX MMR exome	Total All overlap SNPs	All unique to JAX SNPs, PASS	All unique to Sanger SNPs, PASS	% JAX SNPs overlap with Sanger
AKR_J	81703	78658	76587	4436	7488	97.3671
BALB_cJ	73597	72081	70069	4222	4548	97.2087
C3H_HeJ	85039	79801	78796	4017	6182	98.7406
C57BL_6NJ	213	249	146	8	5	58.6345
NOD_ShiLtJ	85517	84174	81341	5299	5504	96.6344
NZO_HlLtJ	83546	81781	79287	4964	5783	96.9504
PWK_PhJ	312011	308706	299397	16075	22930	96.9845
Sample	Total Sanger	Total JAX MMR exome	Total All overlap Indels	All unique to JAX Indels, PASS	All unique to Sanger Indels, PASS	% JAX Indels overlap with Sanger
AKR_J	10513	8269	7321	1645	2052	88.5355
BALB_cJ	9314	8460	7275	1913	1229	85.9929
C3H_HeJ	10696	9437	8203	2164	1404	86.9238
C57BL_6NJ	131	80	65	11	14	81.25
NOD_ShiLtJ	10484	9867	8351	2222	1371	84.6357
NZO_HlLtJ	10161	9456	7964	2127	1436	84.2217
PWK_PhJ	32790	33717	26933	6802	5619	79.8796
JAX stock number	Strain	MMR exome, Mouse ID	MMR exome, sex, birthdate	MMR exome, generation	Sanger whole genome, Mouse ID	Sanger whole genome, sex, birthdate	Sanger whole genome, generation	generations removed
648	AKR_J	03-05916-4-1	male, 5/26/2004	F244	07-005929-5-1	female, 6/3/2008	F256	12
651	BALB_cJ	07-007563-4	male, 11/11/2007	F223	08-007547	female, 7/30/2008	F226	3
659	C3H_HeJ	09-007229	male, 8/12/2009	F258pF259	08-007202	female, 7/31/2008	F258pF262	3
5304	C57BL_6NJ	08-0099802-13	male, 9/28/2009	?+5pF3	F:163 M:164	female, 3/1/2008	?+F8	5
1976	NOD_ShiLtJ	03-04915-85	male, 3/22/2004	F114	07-004979-2	female, 6/18/2008	F117pF121	7
2105	NZO_HlLtJ	04-65233	male, 6/5/2004	F?+30	F:198, 199 M:200	female, 5/20/2008	?+F41	11
3715	PWK_PhJ	840	male, 2/9/2007	F69+3+13 (F85?)	F:886 M:887	female, 6/1/2008	F69+3+17 (F89?)	4
