# Supplementary material for: Exome sequencing reveals pathogenic mutations in 91 strains of mice with Mendelian disorders
Source: HighWire-hosted journal article supplement (doi:10.1101/gr.186882.114), 2015-04-27
Supplement: Supplemental_Table_3.xlsx [file Supplemental_Table_3.xlsx]

## Sheet: Sheet1
Gene Symbol	Allele Name (symbol)	Human Ortholog	Human Disease Association(s)/OMIM	Molecular description	Mutation Category	Inheritance	Primary
				(Annovar)			Phenotype
4732456N10Rik*	witchnails (whnl)	KRT3		frameshift	small insertion	recessive	integument
4930453N24Rik*	dense incisors (din)	C3orf38		4930453N24Rik:NM_026273:	nonsense	recessive	craniofacial
				exon3:c.T729A:p.C243X
Ank1	pale lethal (pale)	ANK1	SPHEROCYTOSIS, TYPE 1	splice acceptor;	splice acceptor/	recessive	growth/size pigmentation
				Ank1: NM_001110783:exon26:c.2761-1G>T	donor
				NM_001277280:exon25:c.2737-1G>T
				NM_001277281:exon25:c.2626-1G>T
				NM_001277284:exon25:c.2626-1G>T
				NM_001277289:exon26:c.2674-1G>T
				NM_001277286:exon26:c.2674-1G>T
				NM_031158:exon26:c.2674-1G>T
Ap3b2	mutation 2 Jackson (m2J)	AP3B2		Ap3b2:NM_021492:exon12:c.C1303T:p.R435X	nonsense	recessive	behavior;
							neurological
Ap3d1	mocha 4 Jackson (mh-4J)	AP3D1	STORAGE POOL PLATELET DISEASE, HERMANSKY PUDLAK SYNDROME 1	Ap3d1:NM_007460:exon28:c.3293_3301A	small deletion	recessive	behavior;
							neurological growth/size
Atp8a2	agitans-like 3 Jackson (agil-3J)	ATP8A2	CEREBELLAR ATAXIA, MENTAL RETARDATION, AND DYSEQUILIBRIUM SYNDROME	Atp8a2:NM_015803:exon2:c.193_195A	small deletion	recessive	behavior;
							neurological
Atp8a2***	wabbler lethal (wl)	ATP8A2	CEREBELLAR ATAXIA, MENTAL RETARDATION, AND DYSEQUILIBRIUM SYNDROME	Atp8a2:NM_015803:exon22:c.1915_1936G	small deletion	recessive	behavior;
							neurological
Atp8a2***	wabbler lethal 3 Jackson (wl-3J)	ATP8A2	CEREBELLAR ATAXIA, MENTAL RETARDATION, AND DYSEQUILIBRIUM SYNDROME	frameshift (exon 31, 32; duplication in exon 32)	large deletion, duplication	recessive	behavior;
							neurological
Atp8a2***	wabbler lethal vestibulomotor degeneration (wl-vmd)	ATP8A2	CEREBELLAR ATAXIA, MENTAL RETARDATION, AND DYSEQUILIBRIUM SYNDROME	in-frame deletion (exon 32)	large deletion	recessive	behavior;
							neurological
Axin2	mutation 1 Jackson (M1J)	AXIN2	OLIGODONTIA-COLORECTAL CANCER SYNDROME; ODCRCS	Axin2:NM_015732:exon6:c.T1644A:p.Y548X	nonsense	dominant	limbs/digits/tail
Cacna1a	small roller (smrl)	CACNA1A	SPINOCELLEBELLAR ATAXIA	Cacna1a:NM_001252059:exon1:c.105_105delinsCG,	small insertion	recessive	behavior;
				Cacna1a:NM_001252060:exon1:c.105_105delinsCG,			neurological mortality/aging; growth/size
				Cacna1a:NM_001252061:exon1:c.105_105delinsCG,
				Cacna1a:NM_007578:exon1:c.105_105delinsCG
Celsr1	curly tail bobber (ctb)	CELSR1	NEURAL TUBE DEFECTS	Celsr1:NM_009886:exon5:c.4614_4615G	small deletion	recessive	behavior;
							neurological;
							hearing, vestibular, integument
Clec16a	curvy tail (curt)	CLEC16A		Clec16a:NM_001204229:exon21:c.2429_2435ACC,	small deletion	recessive	skeletal;
				Clec16a:NM_177562:exon21:c.2435_2441ACC			limbs/digits/tail
Cntn1	mutation 1 Jackson (m1J)	CNTN1	MYOPATHY, CONGENITAL, COMPTON-NORTH	Cntn1:NM_001159647:exon8:c.T782G:p.L261X,	nonsense	recessive	behavior;
				Cntn1:NM_001159648:exon8:c.T782G:p.L261X,			neurological;
				Cntn1:NM_007727:exon8:c.T782G:p.L261X			mortality/aging; growth/size
Cntn1	unsteady small lethal (usl)	CNTN1	MYOPATHY, CONGENITAL, COMPTON-NORTH	Cntn1:NM_001159647:exon10:c.G1091A:p.W364X,	nonsense	recessive	behavior;
				Cntn1:NM_001159648:exon10:c.G1091A:p.W364X,			neurological;
				Cntn1:NM_007727:exon10:c.G1091A:p.W364X			mortality/aging; growth/size
Col2a1	Mutation 2 Jackson (M2J)	COL2A1	SPONDYLOEPIPHYSEAL DYSPLASIA CONGENITA and others	splice acceptor;	splice acceptor/donor	dominant	craniofacial
				Col2a1
				NM_031163:exon28:c.1735-1G>T,
				NM_001113515:exon27:c.1531-1G>T
Col2a1**	Mutation 3 Jackson (M3J)	COL2A1	SPONDYLOEPIPHYSEAL DYSPLASIA CONGENITA and others	Col2a1:NM_001113515:exon32:c.C1933T:p.Q645X,	nonsense	dominant	craniofacial
				Col2a1:NM_031163:exon33:c.C2137T:p.Q713X
Ddx10*	mutation 1 Jackson (m1J)	DDX10		Ddx10:NM_029936:exon15:c.C2208A:p.D736E	missense	recessive	craniofacial
Dll3	pudgy 2 Jackson (pu-2J)	DLL3	SPONDYLOCOSTAL DYSOSTOSIS 1, AUTOSOMAL RECESSIVE	Dll3:NM_007866:exon6:c.G910A:p.G304R	missense	recessive	limbs/digits/tail
Dsp	ruffled (rul)	DSP	KERATOSIS PALMOPLANTARIS STRIATA II; PPKS2 and others	Dsp:NM_023842:exon24:c.7829_7829delinsGTGTCAGAA	small duplication	recessive	integument, hearing
							vestibular
Dsp	sporadic fur (sfur)	DSP	KERATOSIS PALMOPLANTARIS STRIATA II; PPKS2 and others	Dsp:NM_023842:exon12:c.G1481A:p.C494Y	missense	recessive	integument
Efnb3	lilting walker (lltw)	EFNB3		Efnb3:NM_007911:exon5:c. G444A:p.G244E	missense	recessive	behavioral; neurological
Elovl3	buttery ruffled fur (burf)	ELOVL3		splice acceptor;	splice acceptor/donor	recessive	pigmentation
				NM_007703:exon2:c.105-1G>A
Fbn2	fused phalanges 4 Jackson (fp-4J)	FBN2	ARTHROGRYPOSIS, DISTAL, TYPE 9	Fbn2:NM_010181:exon54:c.T6799C:p.S2267P	missense	recessive	skeletal
Fdxr*	mutation 1 Jackson (m1J)	FDXR		Fdxr:NM_007997:exon10:c.G1166A:p.R389Q	missense	recessive	behavioral; neurological
Fgfr1	ear askew (Eask)	FGFR1	OTITIS MEDIA, SUSCEPTIBILITY TO	Fgfr1:NM_001079909:exon3:c.C174A:p.N58K,	missense	dominant	craniofacial
				Fgfr1:NM_001079908:exon4:c.C441A:p.N147K,
				Fgfr1:NM_010206:exon4:c.C441A:p.N147K
Foxn1	nude 2 Jackson (nu-2J)	FOXN1	DIGEORGE SYNDROME,T-CELL IMMUNODEFICIENCY, CONGENITAL ALOPECIA, AND NAIL DYSTROPHY	Foxn1:NM_001277290:exon3:c.333_340T,	small deletion	recessive	pigmentation
				Foxn1:NM_008238:exon3:c.336_343T
Frem2	no eyelid (ne)	FREM2	FRASER SYNDROME	Frem2:NM_172862:exon9:c.C6479T:p.A2160V	missense	recessive	craniofacial skeletal
Gata3	juvenile alopecia (jal)	GATA3	HYPOPARATHYROIDISM, SENSORINEURAL DEAFNESS AND RENAL DISEASE (HDR)	IAP insertion (intron 2-3, exon 3); unknown	large insertion	recessive
Gdf5	brachypody 5 Jackson (Bp-5J)	GDF5	BRACHYDACTYLY, TYPE A2; CHONDRODYSPLASIA AND OTHERS	Gdf5:NM_008109:exon2:c.T1450A:p.Y484N	missense	dominant	skeletal
Golga1*	ages with abnormal gait (awag)	GOLGA1		Golga1:NM_001290649:exon16:c.1467_1474A,	small deletion	recessive	behavior;
				Golga1:NM_029793:exon17:c.1542_1549A			neurological
Grid2	hotfoot 18 Jackson (ho-18J)	GRID2		large deletion (incl. exons 3 and 4)	large deletion	recessive	behavior;
							neurological
Grid2	hotfoot 19 Jackson (ho-19J)	GRID2		unknown (affects splicing of exons 8-12, 15-16)	predicted insertion	recessive	behavior; neurological
Gsdma3	mutation 1 Jackson (M1J)	GSDMA		Gsdma3:NM_001007461:exon11:c.1325_1325delinsATGC	small insertion	dominant	integument
Hcn2	tremor and reduced life span (trls)	HCN2		Hcn2:NM_008226:exon2:c.G944A:p.R315Q	missense	recessive	behavior;
							neurological; mortality/aging
Hps1	pale ear 7 Jackson (ep-7J)	HPS1	HERMANSKY-PUDLAK SYNDROME 1	Hps1:NM_019424:exon3:c.G100T:p.E34X	nonsense	recessive	pigmentation
Itpr1	wobbly locomotion (wblo)	ITPR1	SPINOCEREBELLAR ATAXIA 15; SCA15	Itpr1:NM_010585:exon14:c.G1166A:p.R389H	missense	recessive	behavior;
							neurological
Kcnn2	bouncy 3 Jackson (bc-3J)	KCNN2		Kcnn2:NM_080465:exon3:c.G599A:p.W200X	nonsense	recessive	behavior;
							neurological;
Kcnn2	bouncy 6 Jackson (bc-6J)	KCNN2		Kcnn2:NM_080465:exon4:c.G1035A:p.W345X	nonsense	recessive	behavior;
							neurological;
Kcnn2	bouncy 7 Jackson (bc-7J)	KCNN2		Kcnn2:NM_080465:exon8:c.A1582T:p.R528X	nonsense	recessive	behavior;
							neurological;
Kcnn2	bouncy 8 Jackson (bc-8J)	KCNN2		Kcnn2:NM_080465:exon5:c.G1159A:p.V387I	missense	recessive	behavior;
							neurological;
Kif1a	leg dragger (lgdg)	KIF1A	MENTAL RETARDATION, AUTOSOMAL DOMINANT 9; MRD9 and others	Kif1a:NM_001110315:exon20:c.C1777T:p.R593W,	missense	recessive	behavior; neurological
				Kif1a:NM_001294149:exon20:c.C1777T:p.R593W,
				Kif1a:NM_001294150:exon20:c.C1804T:p.R602W,
				Kif1a:NM_008440:exon20:c.C1777T:p.R593W
Kif1a	leg dragger 2 Jackson (lgdg-2J)	KIF1A	MENTAL RETARDATION, AUTOSOMAL DOMINANT 9; MRD9 and others	Kif1a:NM_001294150:exon5:c.C541T:p.L181F,	missense	recessive	behavior; neurological
				Kif1a:NM_001110315:exon6:c.C541T:p.L181F,Kif1a:NM_001294149:exon6:c.C541T:p.L181F,
				Kif1a:NM_008440:exon6:c.C541T:p.L181F
Kntc1*	jagged tail like (jgl)	KNTC1		Kntc1:NM_001042421:exon30:c.C2596T:p.R866X	nonsense	recessive	reproductive; skeletal
Krt27	short term perm (stpm)	KRT27		Krt27:NM_010666:exon6:c.T965C:p.L322P	missense	recessive	integument
Krt71	caracul 18 Jackson (Ca-18J)	KRT71		Krt71:NM_019956:exon7:c.C1292A:p.A431D	missense	dominant	integument
Krt71	caracul 19 Jackson (Ca-19J)	KRT71		Krt71:NM_019956:exon7:c.G1318A:p.E440K	missense	dominant	integument
Lhfpl2**	vaginal imperforation (vgim)	LHFPL2		Lhfpl2:NM_172589:exon3:c.G305A:p.G102E	missense	recessive	reproductive
Lrp4	malformed digits 3 Jackson (mdig-3J)	LRP4	CENANI-LENZ SYNDACTYLY SYNDROME SCLEROSTEOSIS 2	Lrp4:NM_172668:exon25:c.C3472T:p.R1158W	missense	recessive	skeletal
Lrrk1	non-erupting teeth 2 Jackson (nert-2J)	LRRK1		Lrrk1:NM_146191:exon29:c.G4659A:p.W1553X	nonsense	recessive	growth/size skeletal
Lyst	beige 18 Jackson (bg-18J)	LYST	CHEDIAK-HIGASHI SYNDROME	5’ UTR	splice acceptor/donor	recessive	pigmentation
Mc1r	somber 4 Jackson (E-So4J)	MC1R	SKIN/HAIR/EYE PIGMENTATION 2;	Mc1r:NM_008559:exon1:c.G274A:p.E92K	missense	dominant	pigmentation
			MELANOMA, CUTANEOUS MALIGNANT, SUSCEPTIBILITY TO, 5; CMM5 AND OTHERS
Myo10*	mutation 1 Jackson (m1J)	MYO10		Myo10:NM_019472:exon25:c.2845_2853A	small deletion	recessive	pigmentation,
							skeletal
Myo5a	dilute lethal 34 Jackson (dl-34J)	MYO5A	GRISCELLI SYNDROME, TYPE 1	splice donor (retroviral insertion)	splice acceptor/donor	recessive	behavior;
							neurological mortality/aging
Myo7a	shaker 1, 13 Jackson (sh1-13J)	MYO7A	USHER SYNDROME, TYPE I	Myo7a:NM_001256083:exon6:c.G602T:p.R201L,	missense	recessive	behavior;
				Myo7a:NM_001256081:exon7:c.G635T:p.R212L,			neurological mortality/aging
				Myo7a:NM_001256082:exon7:c.G620T:p.R207L,Myo7a:NM_008663:exon7:c.G635T:p.R212L
Ndc1***	skeletal fusions with sterility (sks)	NDC1		Ndc1:NM_028355:exon6:c.620_621TT	splice acceptor/donor	recessive	reproductive;
							skeletal
Notch3**	humpback (hpbk)	NOTCH3	CEREBRAL ARTERIOPATHY, AUTOSOMAL DOMINANT, WITH SUBCORTICAL INFARCTS AND LEUKOENCEPHALOPATHY	splice donor;	splice acceptor/donor	recessive	skeletal
				NM_008716:exon32:c.5818+1G>A			behavior;
							neurological
Oat	retarded hair growth (rhg)	OAT		Oat:NM_016978:exon9:c.G1058C:p.G353A	missense	recessive	integument
Oca2	pink-eyed dilution 18 Jackson (p-18J)	OCA2	SKIN/HAIR/EYE PIGMENTATION, VARIATION IN, 1; SHEP1	Oca2:NM_021879:exon19:c.C1946A:p.A649D	missense	recessive	pigmentation phenotype
Ophn1	wavy tiger (Wtgr)	OPHN1	MENTAL RETARDATION, X-LINKED, WITH CEREBELLAR HYPOPLASIA AND DISTINCTIVE FACIAL APPEARANCE	Ophn1:NM_052976:exon19:c.A1639C:p.K547Q	missense	dominant	reproductive;
							integument
Otop3*	mutation 1 Jackson (m1J)	OTOP3		5’ UTR;	5’ UTR	recessive	behavior; neurological
				NM_172801:c.*190G>A
Pax3	Splotch-like 2 (Splchl2)	PAX3	RHABDOMYOSARCOMA 2 and others	Pax3:NM_001159520:exon2:c.166_173A,	small deletion	semi-dominant	pigmentation
				Pax3:NM_008781:exon2:c.166_173A
Pfas	short face 2 Jackson (Sofa-2J)	PFAS		Pfas:NM_001159519:exon19:c.T2420A:p.M807K	splice acceptor/donor	dominant	craniofacial
Pfas	short face 4 Jackson (Sofa-4J)	PFAS		splice acceptor;	missense	dominant	craniofacial
				NM_001159519:exon8:c.681-1G>A
Pfas**	short face (Sofa)	PFAS		Pfas:NM_001159519:exon27:c.3584_3599G	small deletion	dominant	craniofacial
Pld4	thin hair with small size (thss)	PLD4		Pld4:NM_178911:exon3:c.G136T:p.G46X	nonsense	recessive	growth/size; integument
Prdm9**	reproductive mutant 7 (repro7)	PRDM9		Prdm9:NM_144809:exon10:c.C1432T:p.Q478X	nonsense	recessive	reproductive
Prkra**	little ear (lear)	PRKRA	DYSTONIA 16; DYT16	splice donor	splice acceptor/donor	recessive	craniofacial, growth/size
Relb**	spontaneous hepatitis (shep)	RELB		Relb:NM_001290457:exon8:c.C991A:p.Q331K	missense	recessive	liver/biliary
Robo3	mutation 1 Jackson (m1J)	ROBO3	GAZE PALSY, FAMILIAL HORIZONTAL, WITH PROGRESSIVE SCOLIOSIS; HGPPS	Robo3:NM_001164767:exon2:c.A389G:p.H130R	missense	recessive	behavior; neurological
Rorb	highstepper (hstp)	RORB		unknown	large duplication	recessive	behavior;
							neurological
Rpl31*	dominant tail short (Dts)	RPL31	DIAMOND BLACKFAN ANEMIA	3’ UTR;	3' UTR	dominant	limbs/digits/tail
				NM_001252218:c.*12_*16delinsC,
				NM_001252219:c.*12_*16delinsC,
				NM_053257:c.*12_*16delinsC
Rpl31*	dominant tail short 2 Jackson (Dts-2J)	RPL31	DIAMOND BLACKFAN ANEMIA	3’ UTR;	3' UTR	dominant	skeletal; limbs/digits/tail
				NM_001252218:c.*13_*26delinsA,
				NM_001252219:c.*13_*26delinsA,
				NM_053257:c.*13_*26delinsA
Samd4	sunken (sunk)	SAMD4A		null allele; large deletion	large deletion	recessive	growth/size; skeletal
Scn8a	mutation 11 Jackson (m11J)	SCN8A	EPILEPTIC ENCEPHALOPATHY, EARLY INFANTILE, 13; EIEE13 AND OTHERS	Scn8a:NM_011323:exon5:c.C676T:p.R226X	nonsense	recessive	behavior;
							neurological
Slc45a2	underwhite 6 Jackson (uw-6J)	SLC45A2	OCULOCUTANEOUS ALBINISM and others	null allele; large deletion (spans exons 4-7)	deletion	recessive	pigmentation
Slc6a19	buttercup 2 Jackson (bucp-2J)	SLC6A19	HARTNUP DISORDER and others	Slc6a19:NM_028878:exon9:c.C1330T:p.Q444X	nonsense	recessive	pigmentation;
							metabolic
Slc6a19	buttercup (bucp)	SLC6A19	HARTNUP DISORDER and others	splice acceptor	splice acceptor / donor	recessive	pigmentation, metabolic
Slc6a5	tremor with stiff legged walk (trsl)	SLC6A5	HYPEREKPLEXIA 3	Slc6a5:NM_148931:exon4:c.G810A:p.M270I,	missense	recessive	behavior;
				Slc6a5:NM_001146013:exon5:c.G834A:p.M278I			neurological
Sox10	mutation 2 Jackson (m2J)	SOX10	WAARDENBURG SYNDROME, TYPE 4C; WS4C AND OTHERS	Sox10:NM_011437:exon2:c.T393A:p.N131K	missense	recessive	pigmentation
Sox9	babyface (Bbfc)	SOX9	CAMPOMELIC DYSPLASIA AND 46,XX SEX REVERSAL 2; SRXX2	Sox9:NM_011448:exon1:c.C260T:p.T87M	missense	dominant	craniofacial
Tbc1d20***	blind sterile (bs)	TBC1D20	WARBURG MICRO SYNDROME 4	non-synonymous coding; codon deletion	missense, deletion	recessive	reproductive; neurological
Tdo2	chick yellow (chky)	TDO2		Tdo2:NM_019911:exon9:c.C844T:p.R282X	nonsense	recessive	pigmentation; homeostasis
							/metabolism
Tmem79	mutation 1 Jackson (m1J)	TMEM79		Tmem79:NM_024246:exon2:c.G640A:p.G214R	missense	recessive	integument
Tpp1	mutation 1 Jackson (m1J)	TPP1	CEROID LIPOFUSCINOSIS, NEURONAL, 2	Splice donor	splice acceptor/donor	recessive	behavior;
							neurological
Tshr	hypothyroid 3 Jackson (hyt-3J)	TSHR	HYPERTHYROIDISM, NONAUTOIMMUNE	large deletion; ~200 bp	large deletion	recessive	growth/size
Uchl1	gracile axonal dystrophy 2 Jackson (gad-2J)	UCHL1	PARKINSON DISEASE 5, AUTOSOMAL DOMINANT; PARK5	Uchl1:NM_011670:exon4:c.C293A:p.A98E	missense	recessive	behavior;
							neurological vision/eye
Vangl2	Loop tail like (Lootl)	VANGL2	NEURAL TUBE DEFECTS	5’ UTR;	5' UTR	semi-dominant	mortality/
				NM_033509:c.-14078A>G			aging; embryogenesis
Wnt7a	postaxial hemimelia Jackson (px-J)	WNT7A	FIBULAR APLASIA OR HYPOPLASIA, FEMORAL BOWING AND POLY-, SYN-, AND OLIGODACTYLY	splice donor; deletion >20kb	large deletion	recessive	skeletal; limbs/digits
							/tail
