# Supplementary material for: Exome sequencing reveals pathogenic mutations in 91 strains of mice with Mendelian disorders
Source: HighWire-hosted journal article supplement (doi:10.1101/gr.186882.114), 2015-04-27
Supplement: Supplemental_Table_5.xlsx [file Supplemental_Table_5.xlsx]

## Sheet: Sheet1
FDR:
Coverage	AKR/J	BALB/cJ	C3H/HeJ	NOD/ShiLtJ	NZO/HILtJ	PWK/PhJ	Average
>=5	13.41	13.75	10.13	12.66	14.49	7.25	11.95
FNR:
Coverage	AKR/J	BALB/cJ	C3H/HeJ	NOD/ShiLtJ	NZO/HILtJ	PWK/PhJ	Average
>=5	3.67467	1.33531	1.1775	1.24417	1.53148	2.08711	1.84171
