# Supplementary material for: Exome sequencing reveals pathogenic mutations in 91 strains of mice with Mendelian disorders
Source: HighWire-hosted journal article supplement (doi:10.1101/gr.186882.114), 2015-04-27
Supplement: Supplemental_Table_6.xlsx [file Supplemental_Table_6.xlsx]

## Sheet: Sheet1
Gene Symbol	Allele	Primer Name	Primer Sequence (5' ->3')
4732456N10Rik	whnl	4732456N10Rik_whnl_L	CAGTGCCAAGACGAGTGGTA
		4732456N10Rik_whnl_R	TGATACTCAGGCAGGCAGTG
4930453N24Rik	din	4930453N24Rik_din_L	TGATTCAGGAGCAAGGGAAC
		4930453N24Rik_din_R	TTGTTTCACAGCAGGCAAAG
Ank1	pale	Ank1_pale_L	ACTTTACAGGGGACCAG
		Ank1_pale_R	GGCTAATGTTGTCTGAGGTC
Ap3b2	m2J	Ap3b2_m2J_L	GGACACTTCTCCAGGCAAAC
		Ap3b2_m2J_R	TGGGGGTGTTACAGCCTTAG
Ap3d1	mh-4J	Ap3d1_mh4J_L	TCACCATTCAGAGCATCGTC
		Ap3d1_mh4J_R	ACAGGCACACAGGGTAGTCC
Atp8a2	agil-3J	Atp8a2_agil3J_L	AAAGACTTCCCTCCCACGTT
		Atp8a2_agil3J_R	CATTGGAAGTGTCCCTGGTC
Axin2	M1J	Axin2_M1J_L	TCTTGTTCACCTCCCCTCTG
		Axin2_M1J_R	GTGGCTTTTGCATTTGGAGT
Cacna1a	smrl	Cacna1a_smrl_L	CCATCTCCAGCCCCTATCC
		Cacna1a_smrl_R	CTTTGCTCTTTGCAGAATGG
Celsr1	ctb	Celsr1_ctb_L	ACGAACATCATCCTAAGCAG
		Celsr1_ctb_R	TCTCTGGATCTCCCTCTTG
Cntn1	m1J	Cntn1_m1J_L	GTGACCTCTACTGGCCTTGC
		Cntn1_m1J_R	GGGCCCAAGTACCCTTACTC
	usl	Cntn1_usl_L	GCACCTCACATCAGTGGTCA
		Cntn1_usl_R	CTCACGATCCGCATTGATTA
Col2a1	M2J	Col2a1_M2J_L	CTGGAAAACCTGGTGACGAC
		Col2a1_M2J_R	ACCAGCTTCCCCCTTAGC
	M3J	Col2a1_M3J_L	ACTTACGTTGGCACCTTTGG
		Col2a1_M3J_R	TGGACATTTTCCAGGAGGAG
Ddx10	m1J	Ddx10_m1J_L	TGAGACTGTTTAAGAAATAACTCATTG
		Ddx10_m1J_R	GCCGTAAAACACTTAACCAAAA
Dll3	pu-2J	Dll3_pu2J_L	AGTCATGCAGAGACCCCATC
		Dll3_pu2J_R	TCAGTTGTGATGGGAACAGC
Dsp	rul	Dsp_rul_L	AGGAAGACCGGCAGTCAGTA
		Dsp_rul_R	GGGAGAGCTTCTGACCAGTG
	sfur	Dsp_sfur_L	ACTCCTGGGCAGTCTTTGAA
		Dsp_sfur_R	AACCCTGTCTCGAAAAACCA
Efnb3	lltw	Efnb3_lltw_L	CTCGTAGTGAGGGCAGAAGG
		Efnb3_lltw_R	GGCTGGGTGTACCCAATATC
Fbn2	fp-4J	Fbn2_fp4J_L	TGGTGTGACAGAGGGACAAA
		Fbn2_fp4J_R	AAGAAGGCGAGATGTCCTGA
Fdxr	m1J	Fdxr_m1J_L	TGAATGAACAAGACGGGTGA
		Fdxr_m1J_R	GCAGCGTTGGGTATAAGAGC
Fgfr1	Eask	Fgfr1_Eask_L	ATGCTGTTTGGATGGAGGTC
		Fgfr1_Eask_R	CTTTAGCCAGGCCTTCCTCT
Foxn1	nu-2J	Foxn1_nu2J_L	ATCTCCAGACCCAGAGCAGA
		Foxn1_nu2J_R	CTCCTCAAAGGCTTCCAGTG
Frem2	ne	Frem2_ne_L	TTGACAGTGGTCTCTCGAGGT
		Frem2_ne_R	TTGTCAGTGCACATTTGGTG
Gdf5	Bp-5J	Gdf5_Bp5J_L	GACTGGATCATCGCACCTCT
		Gdf5_Bp5J_R	GTTCCTTGGGCAGGAATCTT
Golga1	awag	Golga1_awag_L	TGTCGAAGTTCCTGCTCCTT
		Golga1_awag_R	ATTGTGCAAGGCCATTTAGG
Gsdma3	M1J	Gsdma3_M1J_L	TGCTCTGGTAGGAGGGAGAA
		Gsdma3_M1J_R	CAAGATGAGCAGGCATTTCA
Hcn2	trls	Hcn2_trls_L	GGGCATCACTTTCTTCAAGG
		Hcn2_trls_R	GACTTTAGTCCCACCCAAGC
Hps1	ep-7J	Hps1_ep7J_L	ACAGGAACCCCAGAAGGACT
		Hps1_ep7J_R	GCCAAGCTTTTCAGATGGAG
Itpr1	wblo	Itpr1_wblo_L	GGTGACAGGAGCCACTGATT
		Itpr1_wblo_R	TTTGGCCATGACCCTACTCT
Kcnn2	bc-3J	Kcnn2_bc3J_L	GCATCCCCTGTTGTGTCTTT
		Kcnn2_bc3J_R	CCAATGCTTCTAGACGAGGC
	bc-6J	Kcnn2_bc6J_L	TTCGCTTCTGAGGCAAAAGT
		Kcnn2_bc6J_R	CCCGGATAACGCTGATTAGA
	bc-7J	Kcnn2_bc7J_L	GCACATGGAATACTAAGACTGTCAA
		Kcnn2_bc7J_R	TGGAAAGGGGAAAACACTCA
	bc-8J	Kcnn2_bc8J_L	CTTAAAGGAACATTGCTTGC
		Kcnn2_bc8J_R	TGCTTTTCTGCTTTGGTAAG
Kif1a	lgdg	Kif1a_lgdg_L	GTGTGGCTAAGGAGAACAAG
		Kif1a_lgdg_R	GATTTACTGTGAGCGAGTCC
	lgdg-2J	Kif1a_lgdg2J_L	TAAGCCACATTGTCACATGG
		Kif1a_lgdg2J_R	TACTGGTCCTCCAACTCCTG
Kntc1	jgl	Kntc1_jgl_L	GGGCAAACACAGGAGTCAGT
		Kntc1_jgl_R	CTGTAACGCTTCCATGCTGA
Krt27	stpm	Krt27_stpm_L	CGGCAGTAGGTCTCGATCTC
		Krt27_stpm_R	AATGTGACCGATTGCCTTGT
Krt71	Ca-18J	Krt71_Ca18J_L	GGCAGGTTGTAATGGCTGAG
		Krt71_Ca18J_R	GTGACAGTGCCCTCAAGGAT
	Ca-19J	Krt71_Ca19J_L	CAAGCACACTCTGCACACCT
		Krt71_Ca19J_R	GTGACAGTGCCCTCAAGGAT
Lhfpl2	vgim	Lhfpl2_vgim_L	CACTACCTGGGCATCCTCTG
		Lhfpl2_vgim_R	CCAGCCCTCTTCAACAGATG
Lrp4	mdig-3J	Lrp4_mdig3J_L	GCTGTGCACACCTTCACCTA
		Lrp4_mdig3J_R	GTCAGTGTGCTCTTCCGACA
Lrrk1	nert-2J	Lrrk1_nert2J_L	GTACTACAACCAGGCTTTGC
		Lrrk1_nert2J_R	ATGAAAGACCCAACCTTTG
Lyst	bg-18J	Lyst_bg18J_G1_L	ACTTGATGTGCTTGCTCATG
		Lyst_bg18J_G1_R	TTCAAGAACCCGCCTAGAAG
		Lyst_bg18J_G2_L	TGTGAAAATCCTTCTAGGCG
		Lyst_bg18J_G2_R	GTGTTTCATCACAGCAACTG
		Lyst_bg18J_G3_L	CAGCTCACAACTGTCTGATG
		Lyst_bg18J_G3_R	CACCATGACTCTCTGGCATG
Mc1r	E-So-4J	Mc1r_ESo4J_L	TCCACAGACCGCTTCCTACT
		Mc1r_ESo4J_R	AGCGTCACGATGCTGTGATA
Myo10	m1J	Myo10_m1J_L	CTGGAAAAGCAAAGGGAGAA
		Myo10_m1J_R	GAGTCCTTGAAGGCGTCGT
Myo5a	dl-34J	Myo5a_dl34J_L	TCAAAGGCAGAAGAGGAGAGA
		Myo5a_dl34J_R	AGTGCTGGCACCATTCCTAC
Myo7a	sh1-13J	Myo7a_sh1-13J_L	GGAGCTGGCAAGACAGAGAG
		Myo7a_sh1-13J_R	gaagtgggcaccaggattg
Notch3	hpbk	Notch3_hpbk_L	GAAGGGAGGGGAGGAGAAG
		Notch3_hpbk_R	ATTTGGGGTTCAGGGTGTG
Oat	rhg	Oat_rhg_L	GTCTCATCACACGGGCATATT
		Oat_rhg_R	TAGAGGACTGCCCTAACCATAG
Oca2	p18J	Oca2_p18J_L	GATAAATCATCCACTGGTGTGC
		Oca2_p18J_R	GCTTCACTCTGCAAACAAAATG
Ophn1	Wtgr	Ophn1_Wtgr_L	TCAAGAGGACACTGTGGCTG
		Ophn1_Wtgr_R	GTCCGTGATCCCAACAGTCT
Otop3	m1J	Otop3_m1J_L	AAGTGAATCAGGCTGGCACT
		Otop3_m1J_R	AAGTGAATCAGGCTGGCACT
Pax3	Splchl2	Pax3_Splchl2_L	GCCAGCCCTTTTCAGTGTAG
		Pax3_Splchl2_R	CTTTCTCGGGCTCTCTCCTT
Pfas	Sofa-2J	Pfas_Sofa2J_innerL	CCTTGAAGAACCAATGTCGGCTGTGCTAAC
		Pfas_Sofa2J_innerR	CTCCCCCTCCCCATGTCACTCCTGAAA
		Pfas_Sofa2J_outerL	TTGTTAGGGTTGGAGGATGCCTGAGTGC
		Pfas_Sofa2J_outerR	TACTTTGCTTCTGGACAAGCCGCAGTGG
	Sofa-4J	Pfas_Sofa4J_L	GAGGCTATGGTGGCAGTGAT
		Pfas_Sofa4J_R	AAAGCAAGGAGCAAGCTCAG
	Sofa	Pfas_Sofa_L	GCGTGTGTAATGGCTGTCAG
		Pfas_Sofa_R	CACAGAGCCTTCCATCCCTC
Pld4	thss	Pld4_thss_L	AGGATCTCTGGAAGAGCAGTTG
		Pld4_thss_R	CACATAGCCTACAACCCTGTGA
Prdm9	repro7	Prdm9_repro7_L	TTCAGATCAGCTTCAGGAACAA
		Prdm9_repro7_R	CACTGAAATATTGCCCACATTG
Prkra	lear	Prkra_lear_L	ACGGCATGAAGACCAAGAAC
		Prkra_lear_R	GTGTTCGGGAGACTGAGGAG
Relb	shep	Relb_shep_L	GGAGCTGGGAATGAAACTCA
		Relb_shep_R	CCTGGTTTGATTCGGGTAGA
Robo3	m1J	Robo3_m1J_L	CTCTTCAGAGCAAACCTGGTC
		Robo3_m1J_R	CAACTTTCTGTTGGCCTTCC
Rorb	hstp	Rorb_hstp_L	AGGAGGAGGAATGGGAAGAA
		Rorb_hstp_R	TGTGAAGCCCTGCTATCCTT
Rpl31	Dts, Dts-2J	Rpl31_Dts_Dts2J_L	ACTGGCTGGGGGAAGATAGT
		Rpl31_Dts_Dts2J_R	GTGCCACAAGAAACCCTGTT
Samd4	sunk	Samd4_sunk_L	TAGGCGACCTAGAGCTTCCA
		Samd4_sunk_mutR	CAGTCCTGAGCTTCCTGGTG
		Samd4_sunk_wtR	GACAGGAGTGAATCCCAACG
Scn8a	m11J	Scn8a_m11J_L	CGGTAATCCCAGGTAAGACG
		Scn8a_m11J_R	TATTTCAAACGCATGGATGG
Slc45a2	uw-6J	Slc45a2_uw6J_L	TGGTAGAAAAAGGACCCGTAAA
		Slc45a2_uw6J_R	CACTTCCTGTGATCCTCTTGAA
Slc6a19	bucp-2J	Slc6a19_bucp2J_L	GACCTTGTGTTGTGCATTGG
		Slc6a19_bucp2J_R	CAACAATTCTTTGGGCCACT
	bucp	Slc6a19_bucp_L	TGCTATACATGAGCGTTTTG
		Slc6a19_bucp_R	CTGGTCAGTCTTTGACCTTC
Slc6a5	trsl	Slc6a5_trsl_L	GGGCATCACTTTCTTCAAGG
		Slc6a5_trsl_R	GACTTTAGTCCCACCCAAGC
Sox10	m2J	Sox10_m2J_L	GGTCAAGAAGGAACAGCAGG
		Sox10_m2J_R	CTCTCTCCCAAAGTTTCCCC
Sox9	Bbfc	Sox9_Bbfc_L	AATCTCCTGGACCCCTTCAT
		Sox9_Bbfc_R	TACTGGTCTGCCAGCTTCCT
Tdo2	chky	Tdo2_chky_L	TGTGAACTCCAGATCAGGGC
		Tdo2_chky_R	ATGACTGACACGCAATGCTC
Tmem79	m1J	Tmem79_m1J_L	TTCGTGCCCATTGATCTACA
		Tmem79_m1J_R	AGAGAGTGGCAGGTTCAGGA
Tpp1	m1J	Tpp1_m1J_L	GCACAGGAGCCCTTCTTACA
		Tpp1_m1J_L	TGGGAAAGCCATAGTAAGTATTCAGA
Tshr	hyt-3J	Tshr_hyt3J_L	CGTGGTGTGGTTTGTCAGTC
		Tshr_hyt3J_R	AGCAGCAGAACGAGGACAAT
Uchl1	gad-2J	Uchl1_gad2J_L	CTGGACCACCATCTGCTTAC
		Uchl1_gad2J_R	CCCCACAAAGCTCTACTCTAACC
Vangl	Lootl	Vangl2_Lootl_L	CCCTGGTCTTTTGCATGGTTTCC
		Vangl2_Lootl_R	GCAGCTTCGAGCACACCTTCC
Wnt7a	px-J	Wnt7a_pxJ_Ex3_L	AGAAGCAAGGCCAGTACCAC
		Wnt7a_pxJ_Int3_R	CAGAAATCATTCCATCTGTGC
		Wnt7a_pxJ_R	ACCAGAGTGGAGCAGAAGGA
RT-PCR Primers
Gene Symbol	Allele	Primer Name	Primer Sequence
Lyst	bg-18J	Lyst-1F	GCTGAATGTTACAGAAGTGC
		Lyst-1R	TGAGAACTCAGTCAGTGTGG
		Lyst-2F	TTCCCTAGCACTCAGTGTAG
		Lyst-2R	CTCCTAACTTAGCCAGTTGG
		Lyst-3F	TTGCAACATCTGTACTGTGG
		Lyst-3R	TGGAAACCACCAAGCCTGTG
		Lyst-4F	GATCTACATGTTGAACTCAG
		Lyst-4R	TCACAGTTCCCTGTTGTATG
		Lyst-5F	CTTGCTCATGTGTTTGAGAG
		Lyst-5R	GCTGTCTGATGATAAGCTTG
		Lyst-6F	GAAGACTGATGTCATCTTGG
		Lyst-6R	AAACCTGACAGGTCAGTAGG
		Lyst-7F	TTAAGCAGTTGCTGAACGCC
		Lyst-7R	AGTCTTCAATGACACTGTGG
		Lyst-8F	TCTCCTGCTTATGAGGCAAG
		Lyst-8R	CCTGTTCACAGCTAAGATGG
		Lyst-9F	GCGATGAGCTACACTCTATG
		Lyst-9R	TCCAACTGCCATGAAGTTGG
		Lyst-10F	TTGACCTGAGTGCCAGCAGG
		Lyst-10R	CGGTTCACTAAGAACTCAGG
		Lyst-11F	CTTTGAGTCCATGACTGATG
		Lyst-11R	AGGCACAACTGGTTACCTGG
		Lyst-12F	ATGCTGACAACATCTTACGG
		Lyst-12R	GATATCTGCTCAGTCATCTG
Grid2	ho-18J, ho-19J	Grid2_Exon3_L	TGGCGACCGCTGATTCTATC
		Grid2_Exon3_R	AGGGCAACATCCATTCCCTG
		Grid2_Exon4_L	CCATGCATATCCCCCACCTC
		Grid2_Exon4_R	ACGGAAACAGCGCTGACTTA
		Grid2_Exon5_L	ATGAATCCTGCCACAGCCAA
		Grid2_Exon7_R	TGTGACAGGATTCCAGCACC
		Grid2_Exon8_L	TAAGTCAGCGCTGTTTCCGT
		Grid2_Exon10_R	TTCTCCCGGTCTGGAGTGAT
		Grid2_Exon11_L	TATGTTGCACCGGACCACAA
		Grid2_Exon12_R	CGAGTCCAAGACTGTGCCAT
		Grid2_Exon13_L	AACTGGCTTAATCCCCCACG
		Grid2_Exon14_R	GGTCACACTGGCCGTTCTTA
		Grid2_Exon15_L	GGTATGGCATTGCACTGCAG
		Grid2_Exon15_R	CTGTTTATGGGGGCTGTCGT
		Grid2_Exon16_L	TAAGAACGGCCAGTGTGACC
		Grid2_Exon16_R	AAAAGCCCCCATTAGGAGCC
